# Supplementary material for: Do placebo expectations influence perceived exertion during physical exercise?
Source: PLoS One. 2017 Jun 29;12(6):e0180434. doi: 10.1371/journal.pone.0180434 (PMC5491246; doi:10.1371/journal.pone.0180434)
Supplement: S1 Dataset — (XLSX) [file pone.0180434.s001.xlsx]

## Sheet: Data
StudyID	Outlier	Condition	Gender	Age	BMI	Fitness	Habitual_Expectation	Physical_Self-Concept	Perceived_Exertion_Baseline	Perceived_Exertion	MC_Effort	MC_Intensity	MC_Duration	MC_Overall	Expectation_Contrast_1	Expectation_Contrast_2	Expectation_Contrast_3
1	1	3	2	23	23.4568	2.68	6	2.8	11	12.1667	3	5	8	3	0	-2	0
2	1	2	2	22	20.3074	3.45	9	3.6	11	13.1667	3	9	10	1	1	1	-1
3	1	3	2	25	18.8271	3.19	8	3.4	9	13.6667	3	7	4	2	0	-2	0
4	1	1	2	24	21.3675	2.74	4	4.2	9	12.1667	5	10	9	1	1	1	1
5	1	2	2	23	17.7462	3.7	10	3.7	11	13.1667	2	9	8	3	1	1	-1
6	1	3	2	22	20.7612	3	7	4.1	13	13.8333	5	9	9	3	0	-2	0
7	1	4	2	20	25.3906	3.08	7	4	13	14.1667	5	5	4	3	-2	0	0
8	1	1	1	23	20.2812	3.44	7	4.1	10	13.1667	4	8	4	2	1	1	1
9	1	2	2	21	27.3437	2.61	8	2	12	16.3333	6	3	3	3	1	1	-1
10	1	3	2	21	19.5918	3.29	3	2.4	13	12.8333	5	10	7	3	0	-2	0
11	1	1	1	27	20.984	4	8	4	10	10.8333	1	10	10	1	1	1	1
12	0	2	1	23	25.464	3.15	8	3.7	11	9.66667	2	10	10	2	1	1	-1
13	1	4	1	24	22.206	2.63	8	3.7	8	12.5	3	8	8	2	-2	0	0
14	0	4	2	20	20.1092	2.44	7	3.5	13	10.8333	3	7	4	3	-2	0	0
15	1	3	2	22	21.2585	2.72	2	2.6	11	13.8333	5	6	3	4	0	-2	0
16	1	2	1	19	20.9024	3.71	5	4.2	12	13	3	4	3	4	1	1	-1
17	1	4	2	24	24.5243	3.28	6	2.5	12	14.6667	5	9	9	2	-2	0	0
18	1	2	2	25	20.202	2.36	10	2.8	11	12.8333	3	9	9	1	1	1	-1
19	1	4	2	20	17.51	3.45	9	4.3	11	12.6667	2	10	10	1	-2	0	0
20	1	4	2	19	22.3094	3.89	7	4.4	12	15.6667	5	5	3	3	-2	0	0
21	1	3	2	19	21.2585	3	8	4	11	12.3333	2	8	9	2	0	-2	0
22	1	1	2	19	20.5499	3.72	7	4.3	10	12	4	9	9	2	1	1	1
23	1	4	2	19	20.3223	3.96	7	3.7	13	13.8333	3	7	6	2	-2	0	0
24	1	2	2	21	18.5901	2.63	6	3.2	10	14.3333	5	7	6	4	1	1	-1
25	1	4	2	19	20.2865	3.02	7	4.6	13	15.6667	4	6	5	3	-2	0	0
26	1	1	2	24	21.4109	2.88	6	3.1	9	12.1667	3	7	6	3	1	1	1
27	1	4	2	32	22.8624	2.39	10	4.7	13	11.6667	2	9	9	2	-2	0	0
28	1	4	1	20	21.6049	4.29	4	3.1	13	12.8333	5	6	5	3	-2	0	0
29	1	2	2	21	18.194	4.21	7	3.7	14	13.5	5	7	5	3	1	1	-1
30	1	2	1	19	24.6181	3.72	6	4.6	13	13.5	2	7	4	2	1	1	-1
31	1	3	2	20	17.8359	3.02	5	3.8	13	14	2	8	7	2	0	-2	0
32	1	4	2	18	24.0882	2.81	8	3.3	12	14.3333	6	7	8	2	-2	0	0
33	1	1	2	21	25.7117	2.43	8	3.9	10	13	3	6	5	3	1	1	1
34	1	3	2	19	19.7232	2.81	9	5.1	8	11.3333	1	10	6	2	0	-2	0
35	1	1	2	29	19.3337	2.79	5	3.1	11	11	2	5	6	2	1	1	1
36	1	1	2	20	25.6896	2.37	5	3.1	13	13	3	9	9	2	1	1	1
37	1	3	2	21	21.1927	3.33	6	4.1	11	15.1667	5	7	3	2	0	-2	0
38	1	4	1	22	22.6347	2.75	8	2.9	13	12.6667	4	6	5	2	-2	0	0
39	1	1	1	27	18.5185	3.39	9	4.8	12	12.6667	4	8	7	2	1	1	1
40	1	3	2	27	19.6752	3.76	10	4.1	12	13.5	2	10	9	2	0	-2	0
41	1	2	2	22	20.202	3.7	6	3.8	12	12.3333	4	5	5	3	1	1	-1
42	1	1	2	20	22.4913	2.48	4	3.4	10	14.1667	5	5	3	4	1	1	1
43	1	3	1	21	26.4236	2.25	6	2	13	12.8333	4	7	5	2	0	-2	0
44	1	1	1	20	24.1633	4.32	9	4.3	14	12.6667	3	9	8	2	1	1	1
45	1	3	1	19	26.2346	3.29	8	3.4	10	11.8333	4	6	7	3	0	-2	0
46	1	3	2	20	20.2812	3.17	6	3.2	11	12.6667	5	5	5	4	0	-2	0
47	1	3	1	23	22.9917	4.18	8	3.6	13	13.3333	2	8	8	2	0	-2	0
48	1	1	2	18	19.1001	3.46	7	4	12	14	3	9	3	3	1	1	1
49	1	1	2	22	19.0311	2.18	7	2.7	13	13	4	8	9	2	1	1	1
50	1	1	2	20	22.1453	2.66	7	4.1	12	13.6667	3	9	7	2	1	1	1
51	1	2	2	20	20.4491	3.27	9	3.1	11	14.8333	4	8	8	2	1	1	-1
52	1	4	2	18	19.2277	3.55	2	3.3	9	15.5	6	4	3	3	-2	0	0
53	1	4	1	21	24.6914	4.25	8	2.2	12	14.8333	5	7	3	3	-2	0	0
54	1	2	1	25	20.6193	3.93	6	3.6	12	12.5	5	7	6	2	1	1	-1
55	1	2	2	24	20.7612	3.04	6	3.2	15	14.3333	3	10	4	4	1	1	-1
56	1	3	2	24	23.3067	2.35	6	3.2	10	12	3	7	4	3	0	-2	0
57	1	4	1	24	18.5135	3.54	4	3.9	9	15.8333	5	4	3	4	-2	0	0
58	1	3	1	21	20.227	4.79	10	5	11	13	3	8	4	2	0	-2	0
59	1	1	2	20	24.677	3.77	8	3.7	10	12.1667	3	8	8	2	1	1	1
60	1	1	1	26	22.2222	3.38	9	4	11	13	3	9	9	1	1	1	1
61	1	2	2	31	19.4932	4.33	7	4.4	13	12.3333	4	7	7	2	1	1	-1
62	1	1	2	18	19.9219	2.45	10	4.5	12	13.5	3	10	10	1	1	1	1
63	1	1	2	19	21.9671	3.01	2	3.2	10	13.8333	2	9	5	4	1	1	1
64	1	2	2	21	20.202	2.97	8	2.9	9	13.8333	5	6	5	3	1	1	-1
65	1	4	2	22	19.3772	3.66	10	4.2	11	13.8333	4	6	7	3	-2	0	0
66	1	4	2	24	21.0667	2.42	4	4	13	15.1667	5	4	3	4	-2	0	0
67	1	3	1	20	24.977	3.58	10	4.3	14	14.1667	4	8	5	2	0	-2	0
68	1	4	2	20	25.5036	2.95	8	3.3	12	12.3333	4	6	7	3	-2	0	0
69	1	1	2	22	25.0135	3.24	9	4.4	14	12.3333	2	9	10	1	1	1	1
70	1	2	2	24	24.093	2.99	9	3.4	9	11.8333	2	6	6	3	1	1	-1
71	1	2	2	25	22.3081	2.98	10	5.1	12	13.3333	3	8	4	2	1	1	-1
72	1	4	2	20	19.9792	2.92	5	4.2	11	14.5	3	5	6	3	-2	0	0
73	1	2	1	22	26.5731	3.78	8	4	14	12.8333	5	6	5	2	1	1	-1
74	1	4	2	22	27.6817	2.22	7	2.6	10	14	5	8	5	3	-2	0	0
75	1	2	1	21	20.0617	3.77	8	3.8	12	13	2	8	8	2	1	1	-1
76	1	2	2	23	24.2424	2.78	10	4.8	9	9.66667	1	10	10	1	1	1	-1
77	1	3	2	20	19.9432	3.14	6	3.6	11	14.3333	2	10	10	1	0	-2	0
78	1	3	2	19	28.3737	2.68	6	2.8	12	13.1667	2	10	10	1	0	-2	0

## Sheet: Labels
Variables	Variable Description	Question	Labels
Outlier	Outlier in regression analyses		0 = outlier; 1 = No outlier
Condition	Experimental condition		1 = Shirt and Exercise-Effect Expectation; 2 = Exercise-Effect Expectation; 3 = No Exercise-Effect Expectation/Control 2; 4 = No Expectation/Control 1
Gender		What is your gender?	1 = Male; 2 = Female
Age		How old are you?
BMI	Body Mass Index (kg/m2)
Fitness	Physical Fitness (Pmax/kg)
MC_Effort	Manipulation Check: Subjective assessment of effort	How exhausting did you find the exercise?	1 = very little exhausting; 7 = very exhausting
MC_Intensity	Manipulation Check: Subjective assessment of intensity	How comfortable did you find the intensity of the exercise?	1= very uncomfortable; 10 = very comfortable
MC_Duration	Manipulation Check: Subjective assessment of duration	How comfortable did you find the duration of the exercise?	1 = very uncomfortable; 10 = very comfortable
MC_Overall	Manipulation Check: Subjective overall assessment	How comfortable did you find the exercise overall?	1 = very comfortable; 5 = uncomfortable
